# Supplementary material
Source: PubMed Central journal article supplement (PMC3947016)
Supplement: NIHMS531483-supplement-1.pdf [file NIHMS531483-supplement-1.pdf]

# A conserved water-mediated hydrogen bond network defines bosutinib's kinase selectivity

Nicholas M. Levinson<sup>1\*</sup> and Steven G. Boxer<sup>1</sup>

<sup>1</sup>Department of Chemistry, Stanford University, Stanford, California, United States of America

\*To whom correspondence should be addressed. Email: nickl@stanford.edu

## Supplementary Information

### Supplementary Results

Supplementary Table 1. X-ray data collection and refinement statistics.

|                                                      | Src WT           | Src A403T        | Src T338M/M314L  |
|------------------------------------------------------|------------------|------------------|------------------|
| <b>Data collection</b>                               |                  |                  |                  |
| Space group                                          | P1               | P1               | P1               |
| Cell dimensions                                      |                  |                  |                  |
| <i>a, b, c</i> (Å)                                   | 41.9, 63.2, 73.7 | 41.8, 63.1, 78.3 | 41.9, 63.1, 74.3 |
| $\alpha, \beta, \gamma$ (°)                          | 79.5, 89.3, 90.1 | 79.5, 89.2, 90   | 78.5, 87.5, 89.8 |
| Resolution (Å)                                       | 72-2.1*          | 62-2.6           | 72-2.6*          |
| <i>R</i> <sub>sym</sub> or <i>R</i> <sub>merge</sub> | 0.145 (0.539)    | 0.121 (0.487)    | 0.195 (0.475)    |
| <i>I</i> / $\sigma I$                                | 5.8 (2.1)        | 5.6 (1.7)        | 4.4 (2.1)        |
| Completeness (%)                                     | 95.9 (93.8)      | 91.8 (92.5)      | 95.8 (94.2)      |
| Redundancy                                           | 3.2              | 1.9              | 3.1              |
| <b>Refinement</b>                                    |                  |                  |                  |
| Resolution (Å)                                       | 2.1              | 2.6              | 2.6              |
| No. reflections                                      | 41303            | 20889            | 21929            |
| <i>R</i> <sub>work</sub> / <i>R</i> <sub>free</sub>  | 0.21/0.25        | 0.21/0.28        | 0.21/0.27        |
| No. atoms                                            |                  |                  |                  |
| Protein                                              | 4278             | 4238             | 4272             |
| Ligand/ion                                           | 64               | 64               | 64               |
| Water                                                | 284              | 91               | 66               |
| <i>B</i> -factors                                    |                  |                  |                  |
| Protein                                              | 34.7             | 37.75            | 41.8             |
| Ligand/ion                                           | 35.1             | 41.2             | 54.6             |
| Water                                                | 32.6             | 27.9             | 29.5             |
| R.m.s. deviations                                    |                  |                  |                  |
| Bond lengths (Å)                                     | 0.008            | 0.009            | 0.009            |
| Bond angles (°)                                      | 1.084            | 1.225            | 1.173            |
| PDB accession code                                   | 4MXO             | 4MXX             | 4MXZ             |

Values in parentheses are for highest-resolution shell.

\*data merged from 2 crystals.

**Supplementary Table 2. IR and binding data for all Src mutants.**

| <b>Src mutant</b> | <b>CN Frequency</b> | <b>Kd(nM)</b> |
|-------------------|---------------------|---------------|
| T338M/A403S       | 2213.1              | 20.8          |
| T338M/A403T/V323T | 2213.1              | 43            |
| T338M/A403T       | 2213.4              | 20.2          |
| T338L             | 2213.7              | 67            |
| T338M/M314L       | 2213.8              | 21.2          |
| T338M/V323T       | 2213.9              | 21            |
| T338M             | 2214.6              | 20            |
| V323C/A403T       | 2215.7              | 48            |
| T338N             | 2215.8              | 70            |
| T338M/A403C       | 2215.8              | 23            |
| T338I             | 2215.9              | 225           |
| T338F             | 2216.0              | 18.5          |
| V323S/A403T       | 2216.9              | 37            |
| T338Q             | 2217.0              | 279           |
| A403T             | 2217.3              | 29            |
| T338I/M314L       | 2217.4              | 578           |
| T338V             | 2217.9              | 11            |
| V323S             | 2218.4              | 2.3           |
| V323C             | 2219.2              | 1.5           |
| V323T             | 2219.8              | 0.8           |
| A403V             | 2220.0              | 0.4           |
| V323L             | 2220.7              | 22.9          |
| A403C             | 2221.5              | 0.4           |
| M314L             | 2221.5              | 2.8           |
| T338S             | 2222.2              | 6.1           |
| M314H             | 2222.8              | 5.7           |
| A403S             | 2223.2              | 0.42          |
| WT                | 2223.6              | 0.73          |
| M314T             | 2224.1              | 3.02          |
| M314C             | 2224.6              | 9.32          |
| M314Q             | 2224.6              | 7.78          |
| M314S             | 2225.6              | 2.04          |
| M314Y             | 2225.6              | 7.95          |

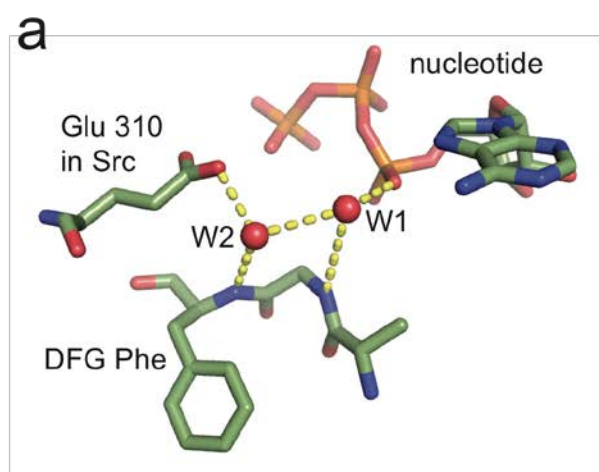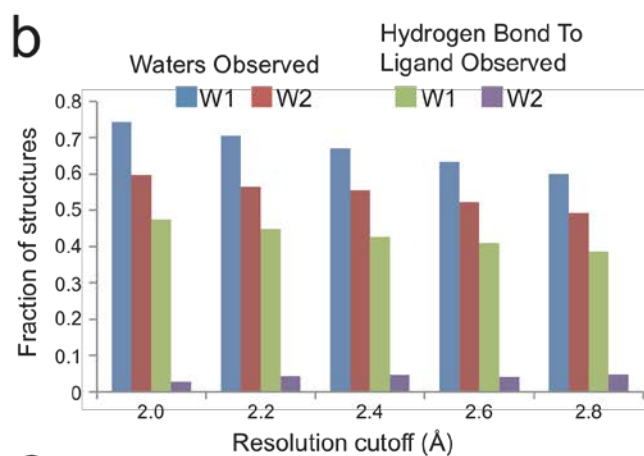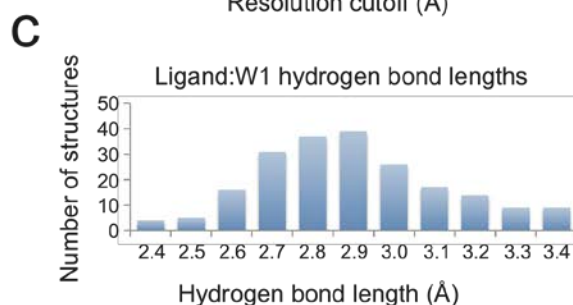

**Supplementary Figure 1. Data from our analysis of structures in the protein databank.** (a) Structure of the cyclin-dependent kinase 2 bound to nucleotide and activating cyclin (pdb code 1JST). Hydrogen bonds are shown as dashed yellow lines. (b) Statistical data from our analysis of 630 kinase/inhibitor complexes. The graph shows the frequencies with which waters W1 and W2 are observed, as well as the frequencies with which they are engaged in hydrogen bonds by the ligand, as a function of different resolution cutoffs. (c) The distribution of hydrogen bond lengths for 180 ligand/W1 hydrogen bonds.

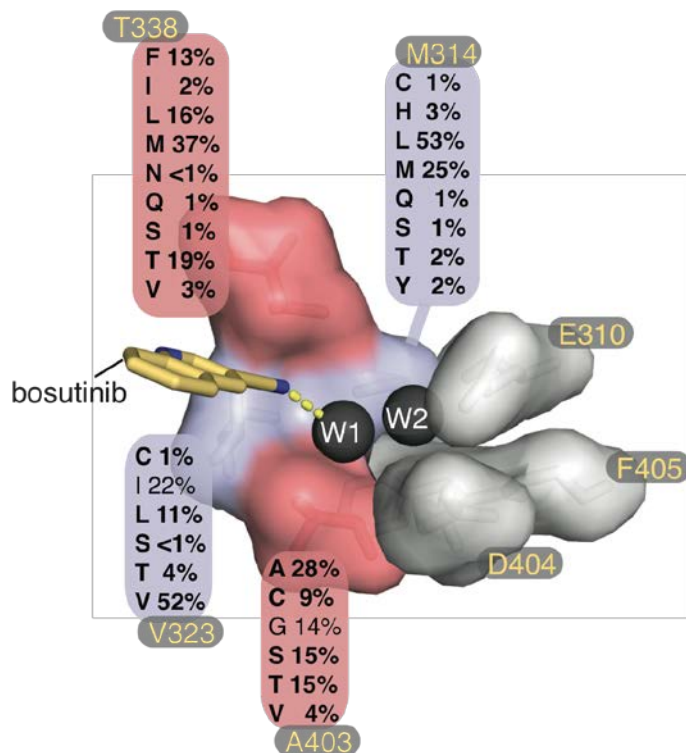

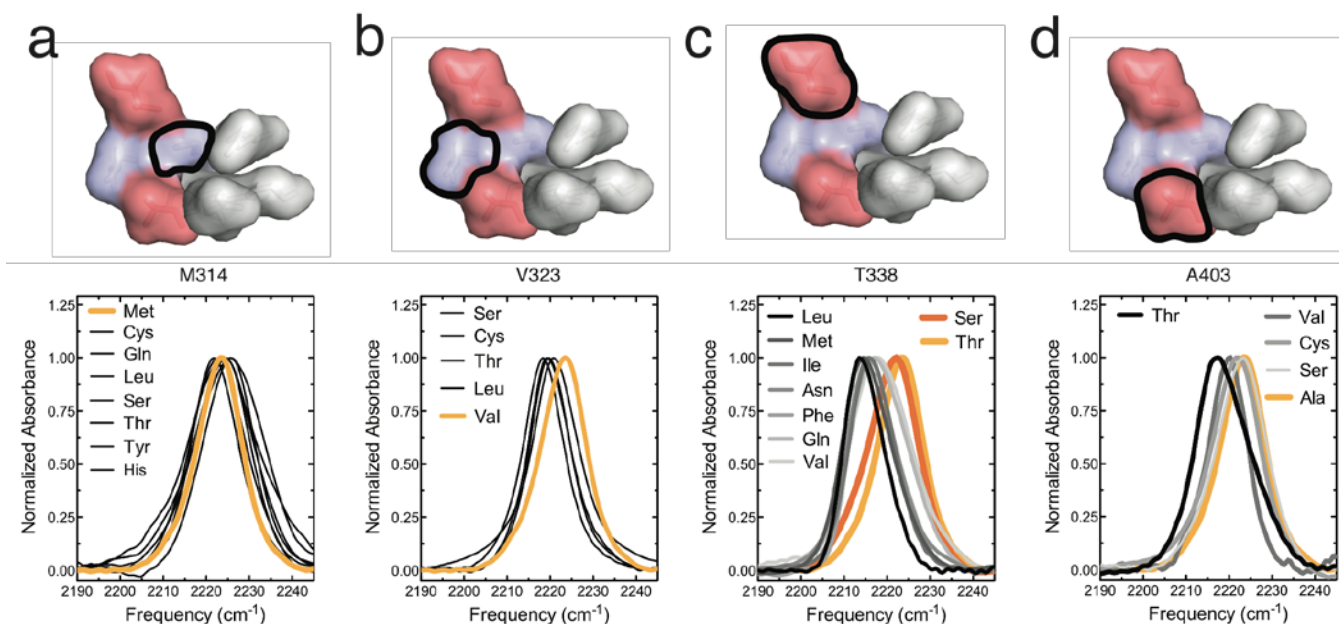

**Supplementary Figure 3. IR spectra of all Src mutants.** (a) Position 314. (b) Position 323. (c) Position 338. (d) Position 403. Above each panel of spectra a surface representation of the water-filled cavity is shown with the position mutated highlighted with a thick black line.

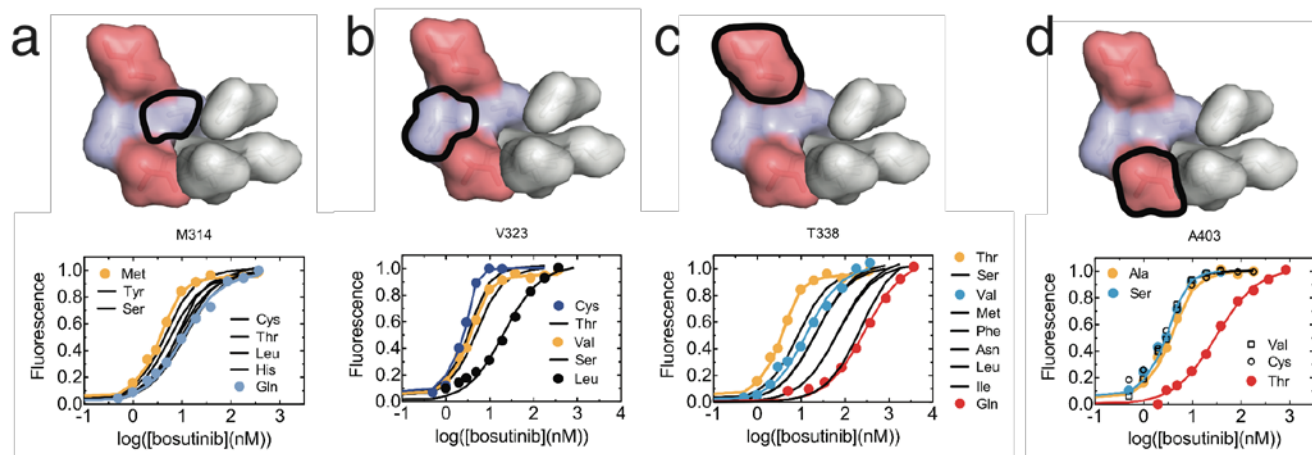

**Supplementary Figure 4. Fluorescence binding measurements for all Src mutants.** (a) Position 314. (b) Position 323. (c) Position 338. (d) Position 403. The fluorescence decrease at 340 nm with excitation at 280 nm is plotted as a function of the bosutinib concentration. Above each panel of binding curves a surface representation of the water-filled cavity is shown with the position mutated highlighted with a thick black line. Binding curves have been normalized to a maximum fluorescence of 1.

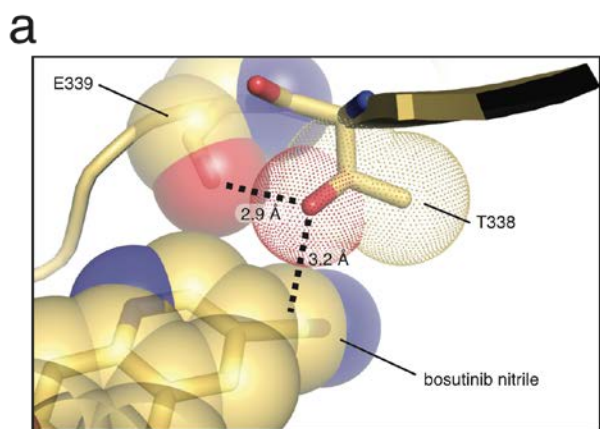

the sidechain of T338 is tightly sandwiched between the bosutinib nitrile and the E339 backbone carbonyl, with which it forms a hydrogen bond

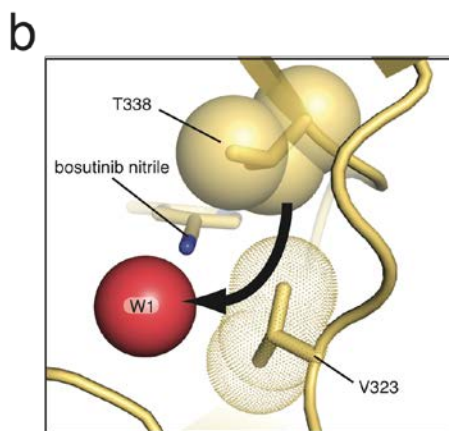

putative coupling pathway by which the T338V substitution would effect W1.

**Supplementary Figure 5. Putative mechanism for disruption of the hydrogen bond network by the T338V substitution.** (a) View of the interactions between the sidechain of T338, the backbone carbonyl of E339, and the nitrile group of bosutinib in the crystal structure of WT Src bound to bosutinib. (b) View of the same structure rotated by 90 degrees about the vertical axis. The thick black arrow denotes a possible pathway by which the effects of the T338V substitution might be coupled to W1, via the sidechain of V323.

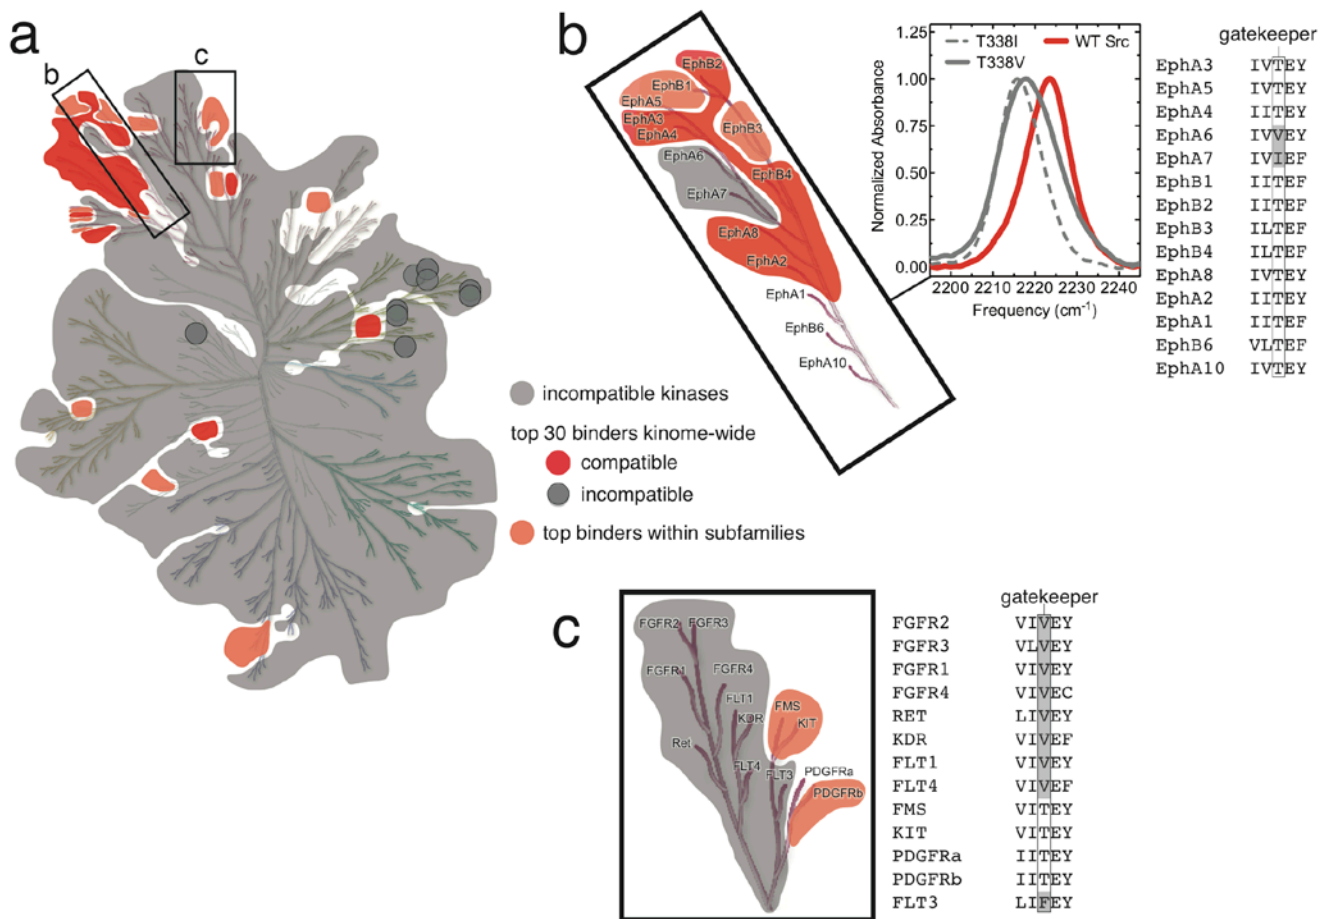

**Supplementary Figure 6. The impact of the hydrogen bond network on bosutinib binding is reflected in the selectivity profile of bosutinib.** (a) Phylogenetic tree of the human kinome taken from the main manuscript, in which kinases with ATP-binding sites that are not compatible with bosutinib's participation in the hydrogen bond network are shaded gray, kinases that bind tightly to bosutinib are colored bright red or dark gray, and kinases for which bosutinib displays subfamily selectivity are colored light red. The binding data is taken from Davis et al.<sup>2</sup> (reference 16 in the main text). (b) Enlarged view of the phylogenetic tree showing the Ephrin receptor family, along with a sequence alignment showing the residues found at the gatekeeper position in this kinase subfamily, and IR spectra of bosutinib bound to WT Src and the T338I and T338V gatekeeper mutants of Src. The coloring is the same as in a. (c) Enlarged view of the phylogenetic tree showing the PDGFR, VEGFR and FGFR subfamilies, along with a sequence alignment showing the residues found at the gatekeeper position in these subfamilies. The coloring is the same as in a. The phylogenetic tree of the human kinome is reproduced with permission from Cell Signaling Technologies.

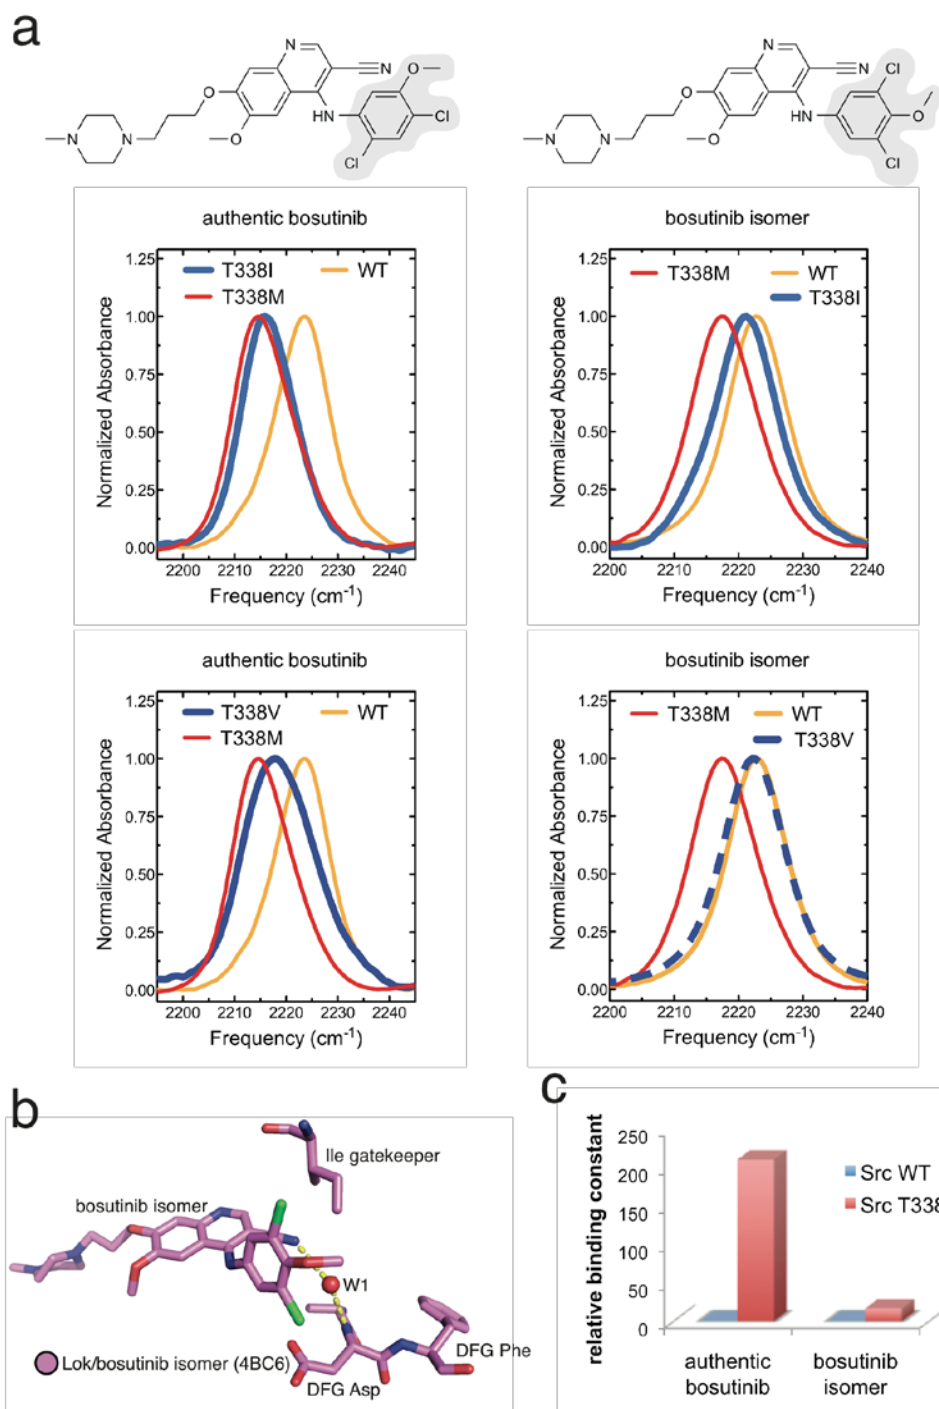

**Supplementary Figure 7. Authentic bosutinib and the bosutinib isomer respond differently to substitutions of the gatekeeper.** (a) IR spectra of authentic bosutinib and the bosutinib isomer bound to WT Src (yellow), the T338M gatekeeper substitution (red), and the T338I (top) and T338V (bottom) gatekeeper substitutions (blue). The chemical structures of authentic bosutinib and the bosutinib isomer are shown above the IR spectra. (b) The crystal structure of the ser/thr kinase LOK bound to the bosutinib isomer (pdb code 4BC6). The isoleucine gatekeeper is highlighted, and the hydrogen bond between the nitrile and W1 is shown as a yellow dashed line. (c) Binding data for authentic bosutinib and the bosutinib isomer measured with WT Src and Src T338I. The y-axis shows the fold change in the dissociation constant upon making the T338I substitution. This highlights that the Ile gatekeeper substitution has a much more severe effect on binding for authentic bosutinib than for the isomer, presumably because the hydrogen bond network is retained in the latter.

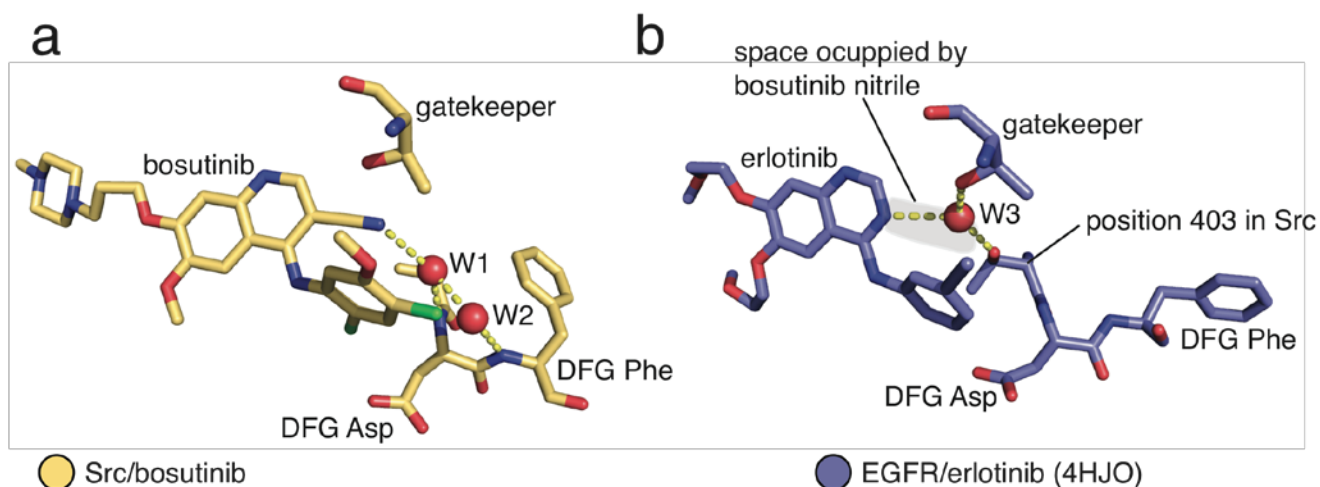

**Supplementary Figure 8. Comparison between the binding modes of bosutinib and the chemically related 4-anilinoquinazoline inhibitors.** (a) Our structure of bosutinib bound to WT Src, showing the manner in which the nitrile engages W1 in a hydrogen bond. (b) The structure of the 4-anilinoquinazoline inhibitor erlotinib bound to EGFR (pdb code 4HJO), in the same orientation as A. The space that would be occupied by the nitrile of bosutinib is shown as a transparent gray oval. Water molecule W3 takes the place of the bosutinib nitrile in the EGFR/erlotinib structure, and forms a hydrogen bond both to the threonine gatekeeper and to the threonine residue found at the position equivalent to A403 in Src. Hydrogen bonds are shown as dashed yellow lines.

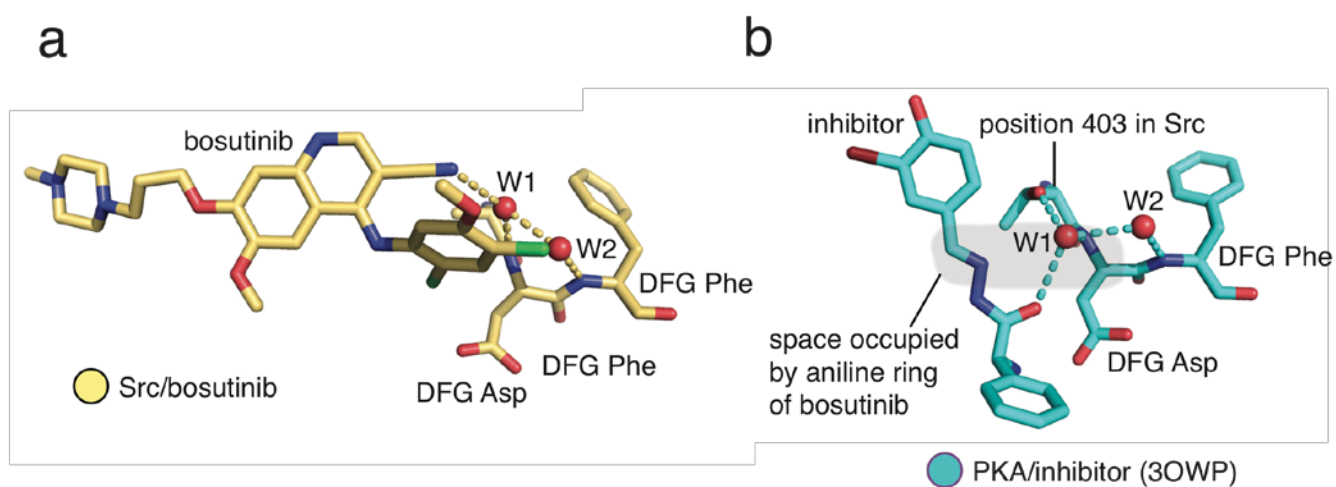

**Supplementary Figure 9. Implications of the A403T substitution for inhibitors that access the water-mediated hydrogen bond network.** (a) Our structure of bosutinib bound to WT Src, showing the manner in which the nitrile engages W1 in a hydrogen bond. (b) A structure of a type I inhibitor bound to PKA (pdb code 3OWP), identified in our search of the protein databank, in which a carbonyl on the inhibitor forms a hydrogen bond to W1 in the presence of a threonine residue at the position equivalent to A403 in Src. The space that would be occupied by the aniline ring of bosutinib is shown as a transparent gray oval.



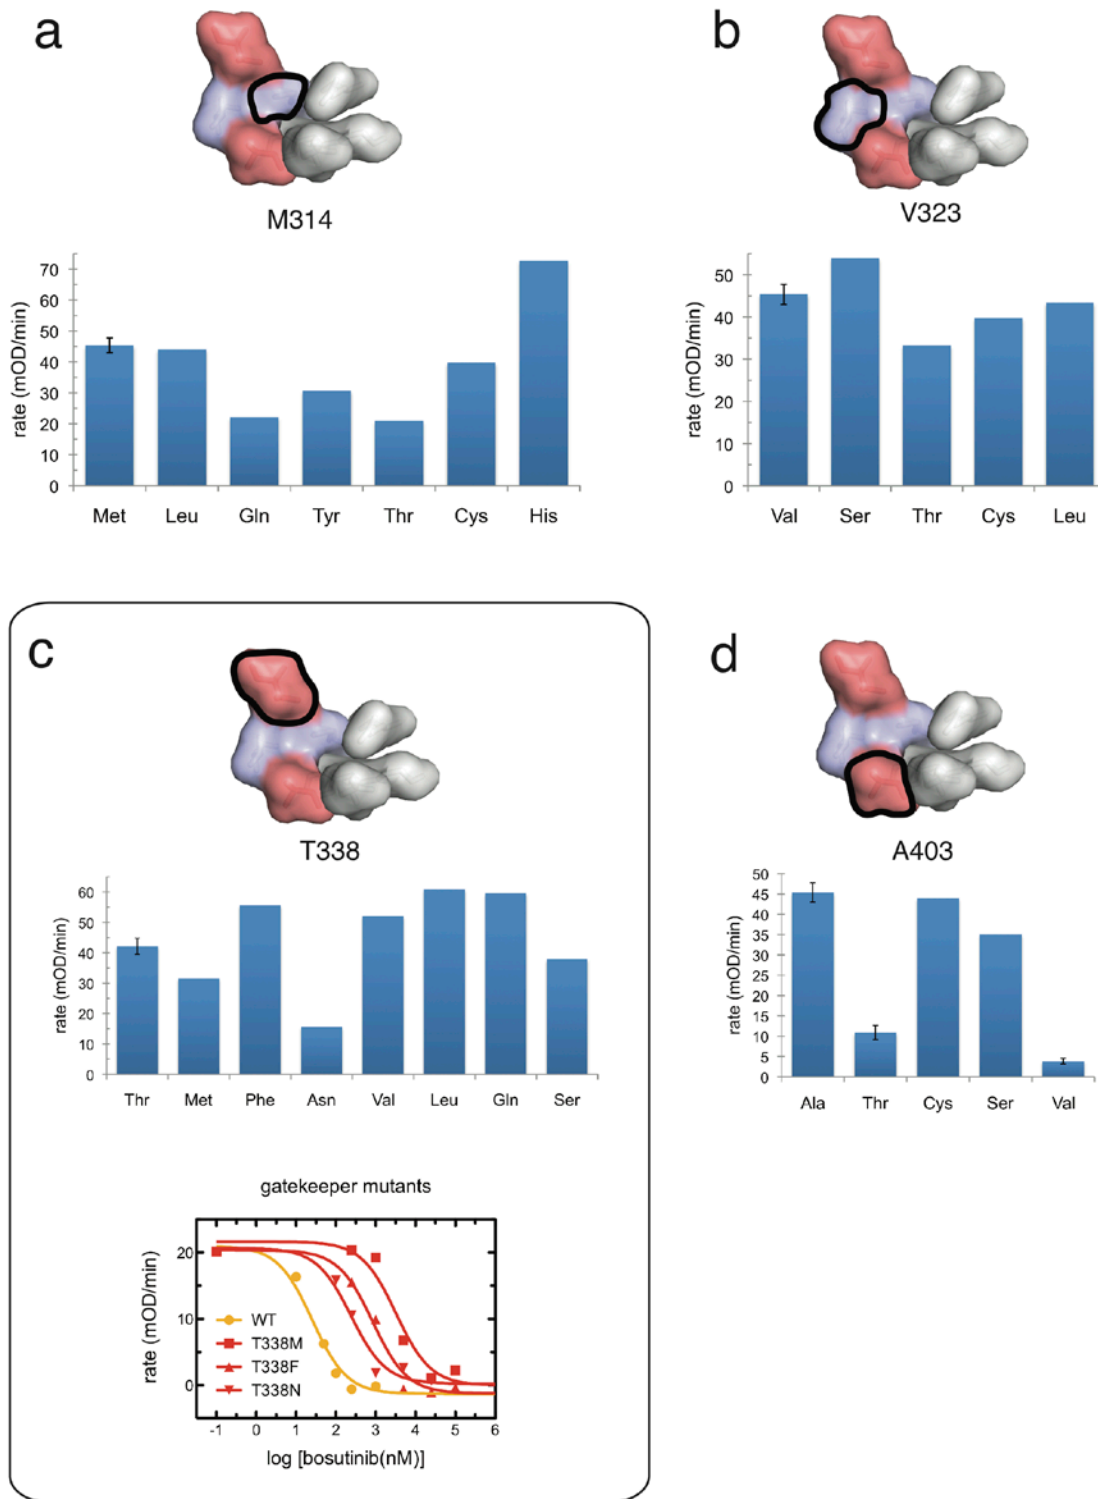

**Supplementary Figure 10. Kinase activity assays of selected Src mutants. (a)** Position 314. **(b)** Position 323 **(c)** Position 338. **(d)** Position 403. The bar graphs show kinase activity measurements performed at 200 nM kinase and 500  $\mu$ M ATP. In c the effect of bosutinib on kinase activity is shown for selected mutants, measured using 100 nM kinase and 500  $\mu$ M ATP, where the activities of the mutants in the absence of bosutinib were normalized to that of WT to facilitate comparison. Above each panel of bar graphs a surface representation of the water-filled cavity is shown with the position mutated highlighted with a thick black line.

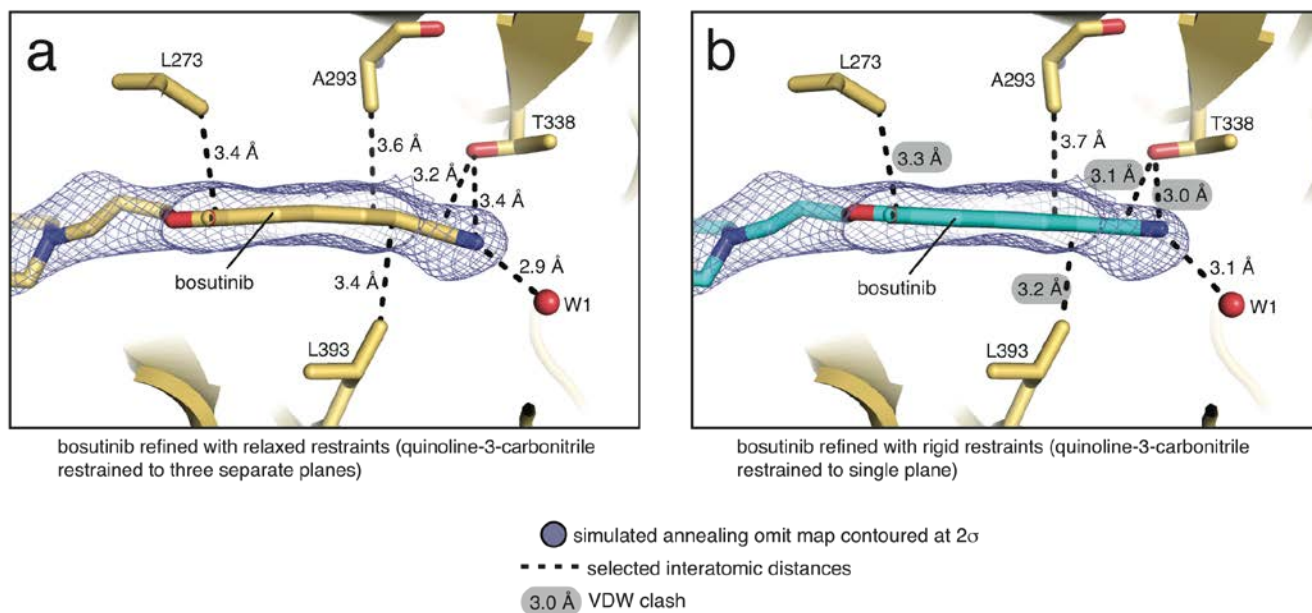

**Supplementary Figure 11. Buckling of the quinoline-3-carbonitrile moiety of bosutinib in the structure of the drug bound to Src.** (a) The structure refined with relaxed restraints as indicated below the panel. (b) The structure refined with rigid restraints as indicated below the panel. The blue mesh is a simulated annealing omit map, which represents the electron density corresponding to bosutinib without phase bias from the model of the drug itself. Relevant interatomic distances are indicated, and significant van der Waals clashes are highlighted in bold type on a gray background and indicate that the buckling of the drug relieves clashes with four ATP-binding site residues.

## References

1. Manning, G., Whyte, D.B., Martinez, R., Hunter, T. & Sudarsanam, S. The protein kinase complement of the human genome. *Science* **298**, 1912-1934 (2002).
2. Davis, M.I., *et al.* Comprehensive analysis of kinase inhibitor selectivity. *Nat Biotechnol* **29**, 1046-1051 (2011).
